# Supplementary material
Source: HighWire-hosted journal article supplement (https://www.cmajopen.ca/highwire/filestream/84465/field_highwire_adjunct_files/3/2020-0057-4-at.pdf)
Supplement: 2020-0057-4-at.pdf [file 2020-0057-4-at.pdf]

**Appendix 4 (as supplied by the authors): Physician response to individual WBI survey questions**

|                                                    | Have you felt burned out from your work |            |         | Have you worried that work is hardening you emotionally |            |         | Have you often felt bothered by feeling down, depressed, or hopeless |            |         |
|----------------------------------------------------|-----------------------------------------|------------|---------|---------------------------------------------------------|------------|---------|----------------------------------------------------------------------|------------|---------|
|                                                    | Yes (N=83)                              | No (N=44)  | P-value | Yes (N=61)                                              | No (N=66)  | P-value | Yes (N=37)                                                           | No (N=90)  | P-value |
| <b>Gender, n (%)</b>                               |                                         |            | 0.52    |                                                         |            | 0.65    |                                                                      |            | 0.76    |
| Male                                               | 57 (63.3%)                              | 33 (36.7%) |         | 44 (48.9%)                                              | 46 (51.1%) |         | 25 (27.8%)                                                           | 65 (72.2%) |         |
| Female                                             | 25 (69.4%)                              | 11 (30.6%) |         | 16 (44.4%)                                              | 20 (55.6%) |         | 11 (30.6%)                                                           | 25 (69.4%) |         |
| Missing                                            | 1                                       | 0          |         | 1                                                       | 0          |         | 1                                                                    | 0          |         |
| <b>When did you graduate medical school, n (%)</b> |                                         |            | 0.23    |                                                         |            | 0.075   |                                                                      |            | 0.18    |
| <2 years                                           |                                         |            |         |                                                         |            |         |                                                                      |            |         |
| 2-5 years                                          | 3 (100.0%)                              | 0 (0.0%)   |         | 3 (100.0%)                                              | 0 (0.0%)   |         | 2 (66.7%)                                                            | 1 (33.3%)  |         |
| 6-10 years                                         | 10 (71.4%)                              | 4 (28.6%)  |         | 9 (64.3%)                                               | 5 (35.7%)  |         | 6 (42.9%)                                                            | 8 (57.1%)  |         |
| 11-15 years                                        | 15 (78.9%)                              | 4 (21.1%)  |         | 11 (57.9%)                                              | 8 (42.1%)  |         | 7 (36.8%)                                                            | 12 (63.2%) |         |
| 16+ years                                          | 55 (60.4%)                              | 36 (39.6%) |         | 38 (41.8%)                                              | 53 (58.2%) |         | 22 (24.2%)                                                           | 69 (75.8%) |         |
| <b>When did you begin working at UHN, n (%)</b>    |                                         |            | 0.14    |                                                         |            | 0.16    |                                                                      |            | 0.29    |
| <2 years                                           | 13 (72.2%)                              | 5 (27.8%)  |         | 9 (50.0%)                                               | 9 (50.0%)  |         | 7 (38.9%)                                                            | 11 (61.1%) |         |
| 2-5 years                                          | 16 (76.2%)                              | 5 (23.8%)  |         | 13 (61.9%)                                              | 8 (38.1%)  |         | 7 (33.3%)                                                            | 14 (66.7%) |         |
| 6-10 years                                         | 18 (78.3%)                              | 5 (21.7%)  |         | 9 (39.1%)                                               | 14 (60.9%) |         | 9 (39.1%)                                                            | 14 (60.9%) |         |
| 11-15 years                                        | 15 (62.5%)                              | 9 (37.5%)  |         | 15 (62.5%)                                              | 9 (37.5%)  |         | 7 (29.2%)                                                            | 17 (70.8%) |         |
| 16+ years                                          | 21 (51.2%)                              | 20 (48.8%) |         | 15 (36.6%)                                              | 26 (63.4%) |         | 7 (17.1%)                                                            | 34 (82.9%) |         |
| <b>Specialty, n (%)</b>                            |                                         |            | 0.33    |                                                         |            | 0.0074  |                                                                      |            | 0.35    |
| Anaesthesia                                        | 25 (71.4%)                              | 10 (28.6%) |         | 25 (71.4%)                                              | 10 (28.6%) |         | 12 (34.3%)                                                           | 23 (65.7%) |         |
| Cardiac Rehabilitation                             | 1 (25.0%)                               | 3 (75.0%)  |         | 1 (25.0%)                                               | 3 (75.0%)  |         | 1 (25.0%)                                                            | 3 (75.0%)  |         |
| Cardiac Surgery                                    | 8 (80.0%)                               | 2 (20.0%)  |         | 6 (60.0%)                                               | 4 (40.0%)  |         | 3 (30.0%)                                                            | 7 (70.0%)  |         |
| Cardiology                                         | 33 (61.1%)                              | 21 (38.9%) |         | 17 (31.5%)                                              | 37 (68.5%) |         | 14 (25.9%)                                                           | 40 (74.1%) |         |
| Medical Imaging                                    | 10 (71.4%)                              | 4 (28.6%)  |         | 7 (50.0%)                                               | 7 (50.0%)  |         | 4 (28.6%)                                                            | 10 (71.4%) |         |
| Vascular Surgery                                   | 4 (50.0%)                               | 4 (50.0%)  |         | 3 (37.5%)                                               | 5 (62.5%)  |         | 1 (12.5%)                                                            | 7 (87.5%)  |         |
| Other                                              | 2 (100.0%)                              | 0 (0.0%)   |         | 2 (100.0%)                                              | 0 (0.0%)   |         | 2 (100.0%)                                                           | 0 (0.0%)   |         |
| <b>Rate satisfaction with the EMR, n (%)</b>       |                                         |            | 0.30    |                                                         |            | 0.047   |                                                                      |            | 0.27    |
| Very unsatisfied                                   | 18 (85.7%)                              | 3 (14.3%)  |         | 14 (66.7%)                                              | 7 (33.3%)  |         | 9 (42.9%)                                                            | 12 (57.1%) |         |
| Somewhat unsatisfied                               | 14 (63.6%)                              | 8 (36.4%)  |         | 10 (45.5%)                                              | 12 (54.5%) |         | 6 (27.3%)                                                            | 16 (72.7%) |         |
| Neutral                                            | 14 (63.6%)                              | 8 (36.4%)  |         | 6 (27.3%)                                               | 16 (72.7%) |         | 3 (13.6%)                                                            | 19 (86.4%) |         |
| Somewhat satisfied                                 | 30 (68.2%)                              | 14 (31.8%) |         | 27 (61.4%)                                              | 17 (38.6%) |         | 16 (36.4%)                                                           | 28 (63.6%) |         |
| Very satisfied                                     | 5 (50.0%)                               | 5 (50.0%)  |         | 4 (40.0%)                                               | 6 (60.0%)  |         | 3 (30.0%)                                                            | 7 (70.0%)  |         |
| Missing                                            | 2                                       | 6          |         | 0                                                       | 8          |         | 0                                                                    | 8          |         |



|                                                                                                                                    | Have you felt burned out from your work |            | Have you worried that work is hardening you emotionally |            | Have you often felt bothered by feeling down, depressed, or hopeless |            |
|------------------------------------------------------------------------------------------------------------------------------------|-----------------------------------------|------------|---------------------------------------------------------|------------|----------------------------------------------------------------------|------------|
| <b>Somewhat / very satisfied with EMR (vs. neutral / unsatisfied), n (%)</b>                                                       | 0.49                                    |            | 0.22                                                    |            | 0.38                                                                 |            |
| Yes                                                                                                                                | 35 (64.8%)                              | 19 (35.2%) | 31 (57.4%)                                              | 23 (42.6%) | 19 (35.2%)                                                           | 35 (64.8%) |
| No                                                                                                                                 | 46 (70.8%)                              | 19 (29.2%) | 30 (46.2%)                                              | 35 (53.8%) | 18 (27.7%)                                                           | 47 (72.3%) |
| Missing                                                                                                                            | 2                                       | 6          | 0                                                       | 8          | 0                                                                    | 8          |
| <b>Staffing levels in this work setting are sufficient, n (%)</b>                                                                  | 0.0092                                  |            | 0.029                                                   |            | 0.42                                                                 |            |
| Disagree strongly                                                                                                                  | 29 (80.6%)                              | 7 (19.4%)  | 24 (66.7%)                                              | 12 (33.3%) | 15 (41.7%)                                                           | 21 (58.3%) |
| Disagree somewhat                                                                                                                  | 32 (76.2%)                              | 10 (23.8%) | 24 (57.1%)                                              | 18 (42.9%) | 11 (26.2%)                                                           | 31 (73.8%) |
| Neutral                                                                                                                            | 4 (57.1%)                               | 3 (42.9%)  | 3 (42.9%)                                               | 4 (57.1%)  | 3 (42.9%)                                                            | 4 (57.1%)  |
| Agree somewhat                                                                                                                     | 11 (57.9%)                              | 8 (42.1%)  | 6 (31.6%)                                               | 13 (68.4%) | 5 (26.3%)                                                            | 14 (73.7%) |
| Agree strongly                                                                                                                     | 5 (33.3%)                               | 10 (66.7%) | 4 (26.7%)                                               | 11 (73.3%) | 3 (20.0%)                                                            | 12 (80.0%) |
| Missing                                                                                                                            | 2                                       | 6          | 0                                                       | 8          | 0                                                                    | 8          |
| <b>Somewhat / strongly agree staffing levels in work setting are adequate (vs. neutral / somewhat or strongly disagree), n (%)</b> | 0.0019                                  |            | 0.0026                                                  |            | 0.26                                                                 |            |
| Yes                                                                                                                                | 16 (47.1%)                              | 18 (52.9%) | 10 (29.4%)                                              | 24 (70.6%) | 8 (23.5%)                                                            | 26 (76.5%) |
| No                                                                                                                                 | 65 (76.5%)                              | 20 (23.5%) | 51 (60.0%)                                              | 34 (40.0%) | 29 (34.1%)                                                           | 56 (65.9%) |
| Missing                                                                                                                            | 2                                       | 6          | 0                                                       | 8          | 0                                                                    | 8          |
| <b>I am treated fairly in the workplace, n (%)</b>                                                                                 | 0.010                                   |            | 0.016                                                   |            | 0.0026                                                               |            |
| Disagree strongly                                                                                                                  | 10 (100.0%)                             | 0 (0.0%)   | 7 (70.0%)                                               | 3 (30.0%)  | 8 (80.0%)                                                            | 2 (20.0%)  |
| Disagree somewhat                                                                                                                  | 17 (81.0%)                              | 4 (19.0%)  | 16 (76.2%)                                              | 5 (23.8%)  | 9 (42.9%)                                                            | 12 (57.1%) |
| Neutral                                                                                                                            | 9 (60.0%)                               | 6 (40.0%)  | 7 (46.7%)                                               | 8 (53.3%)  | 5 (33.3%)                                                            | 10 (66.7%) |
| Agree somewhat                                                                                                                     | 31 (72.1%)                              | 12 (27.9%) | 22 (51.2%)                                              | 21 (48.8%) | 9 (20.9%)                                                            | 34 (79.1%) |
| Agree strongly                                                                                                                     | 14 (46.7%)                              | 16 (53.3%) | 9 (30.0%)                                               | 21 (70.0%) | 6 (20.0%)                                                            | 24 (80.0%) |
| Missing                                                                                                                            | 2                                       | 6          | 0                                                       | 8          | 0                                                                    | 8          |
| <b>Somewhat / strongly agree I am treated fairly (vs. neutral / disagree), n (%)</b>                                               | 0.058                                   |            | 0.016                                                   |            | 0.0017                                                               |            |
| Yes                                                                                                                                | 45 (61.6%)                              | 28 (38.4%) | 31 (42.5%)                                              | 42 (57.5%) | 15 (20.5%)                                                           | 58 (79.5%) |
| No                                                                                                                                 | 36 (78.3%)                              | 10 (21.7%) | 30 (65.2%)                                              | 16 (34.8%) | 22 (47.8%)                                                           | 24 (52.2%) |
| Missing                                                                                                                            | 2                                       | 6          | 0                                                       | 8          | 0                                                                    | 8          |

|                                                    | Have you fallen asleep while sitting inactive in a public place |             |         | Have you felt that things were piling up so high you could not overcome them |            |         | Have you been bothered by emotional problems |            |         |
|----------------------------------------------------|-----------------------------------------------------------------|-------------|---------|------------------------------------------------------------------------------|------------|---------|----------------------------------------------|------------|---------|
|                                                    | Yes                                                             | No          | P-value | Yes                                                                          | No         | P-value | Yes                                          | No         | P-value |
| <b>Gender, n (%)</b>                               |                                                                 |             | 0.67    |                                                                              |            | 0.69    |                                              |            | 0.96    |
| Male                                               | 17 (18.9%)                                                      | 73 (81.1%)  |         | 44 (48.9%)                                                                   | 46 (51.1%) |         | 48 (53.3%)                                   | 42 (46.7%) |         |
| Female                                             | 8 (22.2%)                                                       | 28 (77.8%)  |         | 19 (52.8%)                                                                   | 17 (47.2%) |         | 19 (52.8%)                                   | 17 (47.2%) |         |
| Missing                                            | 0                                                               | 1           |         | 1                                                                            | 0          |         | 1                                            | 0          |         |
| <b>When did you graduate medical school, n (%)</b> |                                                                 |             | 0.17    |                                                                              |            | 0.046   |                                              |            | 0.42    |
| <2 years                                           |                                                                 |             |         |                                                                              |            |         |                                              |            |         |
| 2-5 years                                          | 0 (0.0%)                                                        | 3 (100.0%)  |         | 2 (66.7%)                                                                    | 1 (33.3%)  |         | 3 (100.0%)                                   | 0 (0.0%)   |         |
| 6-10 years                                         | 0 (0.0%)                                                        | 14 (100.0%) |         | 7 (50.0%)                                                                    | 7 (50.0%)  |         | 8 (57.1%)                                    | 6 (42.9%)  |         |
| 11-15 years                                        | 5 (26.3%)                                                       | 14 (73.7%)  |         | 15 (78.9%)                                                                   | 4 (21.1%)  |         | 10 (52.6%)                                   | 9 (47.4%)  |         |
| 16+ years                                          | 20 (22.0%)                                                      | 71 (78.0%)  |         | 40 (44.0%)                                                                   | 51 (56.0%) |         | 47 (51.6%)                                   | 44 (48.4%) |         |
| <b>When did you begin working at UHN, n (%)</b>    |                                                                 |             | 0.43    |                                                                              |            | 0.10    |                                              |            | 0.085   |
| <2 years                                           | 1 (5.6%)                                                        | 17 (94.4%)  |         | 6 (33.3%)                                                                    | 12 (66.7%) |         | 9 (50.0%)                                    | 9 (50.0%)  |         |
| 2-5 years                                          | 3 (14.3%)                                                       | 18 (85.7%)  |         | 15 (71.4%)                                                                   | 6 (28.6%)  |         | 16 (76.2%)                                   | 5 (23.8%)  |         |
| 6-10 years                                         | 6 (26.1%)                                                       | 17 (73.9%)  |         | 13 (56.5%)                                                                   | 10 (43.5%) |         | 13 (56.5%)                                   | 10 (43.5%) |         |
| 11-15 years                                        | 5 (20.8%)                                                       | 19 (79.2%)  |         | 9 (37.5%)                                                                    | 15 (62.5%) |         | 14 (58.3%)                                   | 10 (41.7%) |         |
| 16+ years                                          | 10 (24.4%)                                                      | 31 (75.6%)  |         | 21 (51.2%)                                                                   | 20 (48.8%) |         | 16 (39.0%)                                   | 25 (61.0%) |         |
| <b>Specialty, n (%)</b>                            |                                                                 |             | 0.10    |                                                                              |            | 0.88    |                                              |            | 0.16    |
| Anaesthesia                                        | 8 (22.9%)                                                       | 27 (77.1%)  |         | 20 (57.1%)                                                                   | 15 (42.9%) |         | 23 (65.7%)                                   | 12 (34.3%) |         |
| Cardiac Rehabilitation                             | 0 (0.0%)                                                        | 4 (100.0%)  |         | 1 (25.0%)                                                                    | 3 (75.0%)  |         | 3 (75.0%)                                    | 1 (25.0%)  |         |
| Cardiac Surgery                                    | 4 (40.0%)                                                       | 6 (60.0%)   |         | 6 (60.0%)                                                                    | 4 (40.0%)  |         | 4 (40.0%)                                    | 6 (60.0%)  |         |
| Cardiology                                         | 7 (13.0%)                                                       | 47 (87.0%)  |         | 25 (46.3%)                                                                   | 29 (53.7%) |         | 24 (44.4%)                                   | 30 (55.6%) |         |
| Medical Imaging                                    | 2 (14.3%)                                                       | 12 (85.7%)  |         | 7 (50.0%)                                                                    | 7 (50.0%)  |         | 6 (42.9%)                                    | 8 (57.1%)  |         |
| Vascular Surgery                                   | 4 (50.0%)                                                       | 4 (50.0%)   |         | 4 (50.0%)                                                                    | 4 (50.0%)  |         | 6 (75.0%)                                    | 2 (25.0%)  |         |
| Other                                              | 0 (0.0%)                                                        | 2 (100.0%)  |         | 1 (50.0%)                                                                    | 1 (50.0%)  |         | 2 (100.0%)                                   | 0 (0.0%)   |         |
| <b>Rate satisfaction with the EMR, n (%)</b>       |                                                                 |             | 0.57    |                                                                              |            | 0.77    |                                              |            | 0.87    |
| Very unsatisfied                                   | 3 (14.3%)                                                       | 18 (85.7%)  |         | 13 (61.9%)                                                                   | 8 (38.1%)  |         | 12 (57.1%)                                   | 9 (42.9%)  |         |
| Somewhat unsatisfied                               | 3 (13.6%)                                                       | 19 (86.4%)  |         | 11 (50.0%)                                                                   | 11 (50.0%) |         | 12 (54.5%)                                   | 10 (45.5%) |         |
| Neutral                                            | 7 (31.8%)                                                       | 15 (68.2%)  |         | 12 (54.5%)                                                                   | 10 (45.5%) |         | 10 (45.5%)                                   | 12 (54.5%) |         |
| Somewhat satisfied                                 | 10 (22.7%)                                                      | 34 (77.3%)  |         | 21 (47.7%)                                                                   | 23 (52.3%) |         | 26 (59.1%)                                   | 18 (40.9%) |         |
| Very satisfied                                     | 2 (20.0%)                                                       | 8 (80.0%)   |         | 4 (40.0%)                                                                    | 6 (60.0%)  |         | 5 (50.0%)                                    | 5 (50.0%)  |         |
| Missing                                            | 0                                                               | 8           |         | 3                                                                            | 5          |         | 3                                            | 5          |         |

|                                                                                                                                    | Have you fallen asleep while sitting inactive in a public place |            | Have you felt that things were piling up so high you could not overcome them |            | Have you been bothered by emotional problems |            |
|------------------------------------------------------------------------------------------------------------------------------------|-----------------------------------------------------------------|------------|------------------------------------------------------------------------------|------------|----------------------------------------------|------------|
| <b>Somewhat / very satisfied with EMR (vs. neutral / unsatisfied), n (%)</b>                                                       | 0.77                                                            |            | 0.32                                                                         |            | 0.58                                         |            |
| Yes                                                                                                                                | 12 (22.2%)                                                      | 42 (77.8%) | 25 (46.3%)                                                                   | 29 (53.7%) | 31 (57.4%)                                   | 23 (42.6%) |
| No                                                                                                                                 | 13 (20.0%)                                                      | 52 (80.0%) | 36 (55.4%)                                                                   | 29 (44.6%) | 34 (52.3%)                                   | 31 (47.7%) |
| Missing                                                                                                                            | 0                                                               | 8          | 3                                                                            | 5          | 3                                            | 5          |
| <b>Staffing levels in this work setting are sufficient, n (%)</b>                                                                  | 0.42                                                            |            | 0.0022                                                                       |            | 0.10                                         |            |
| Disagree strongly                                                                                                                  | 7 (19.4%)                                                       | 29 (80.6%) | 27 (75.0%)                                                                   | 9 (25.0%)  | 26 (72.2%)                                   | 10 (27.8%) |
| Disagree somewhat                                                                                                                  | 10 (23.8%)                                                      | 32 (76.2%) | 22 (52.4%)                                                                   | 20 (47.6%) | 19 (45.2%)                                   | 23 (54.8%) |
| Neutral                                                                                                                            | 0 (0.0%)                                                        | 7 (100.0%) | 3 (42.9%)                                                                    | 4 (57.1%)  | 3 (42.9%)                                    | 4 (57.1%)  |
| Agree somewhat                                                                                                                     | 6 (31.6%)                                                       | 13 (68.4%) | 5 (26.3%)                                                                    | 14 (73.7%) | 8 (42.1%)                                    | 11 (57.9%) |
| Agree strongly                                                                                                                     | 2 (13.3%)                                                       | 13 (86.7%) | 4 (26.7%)                                                                    | 11 (73.3%) | 9 (60.0%)                                    | 6 (40.0%)  |
| Missing                                                                                                                            | 0                                                               | 8          | 3                                                                            | 5          | 3                                            | 5          |
| <b>Somewhat / strongly agree staffing levels in work setting are adequate (vs. neutral / somewhat or strongly disagree), n (%)</b> | 0.67                                                            |            | 0.0006                                                                       |            | 0.52                                         |            |
| Yes                                                                                                                                | 8 (23.5%)                                                       | 26 (76.5%) | 9 (26.5%)                                                                    | 25 (73.5%) | 17 (50.0%)                                   | 17 (50.0%) |
| No                                                                                                                                 | 17 (20.0%)                                                      | 68 (80.0%) | 52 (61.2%)                                                                   | 33 (38.8%) | 48 (56.5%)                                   | 37 (43.5%) |
| Missing                                                                                                                            | 0                                                               | 8          | 3                                                                            | 5          | 3                                            | 5          |
| <b>I am treated fairly in the workplace, n (%)</b>                                                                                 | 0.62                                                            |            | 0.63                                                                         |            | 0.076                                        |            |
| Disagree strongly                                                                                                                  | 1 (10.0%)                                                       | 9 (90.0%)  | 6 (60.0%)                                                                    | 4 (40.0%)  | 9 (90.0%)                                    | 1 (10.0%)  |
| Disagree somewhat                                                                                                                  | 4 (19.0%)                                                       | 17 (81.0%) | 12 (57.1%)                                                                   | 9 (42.9%)  | 13 (61.9%)                                   | 8 (38.1%)  |
| Neutral                                                                                                                            | 5 (33.3%)                                                       | 10 (66.7%) | 9 (60.0%)                                                                    | 6 (40.0%)  | 9 (60.0%)                                    | 6 (40.0%)  |
| Agree somewhat                                                                                                                     | 10 (23.3%)                                                      | 33 (76.7%) | 22 (51.2%)                                                                   | 21 (48.8%) | 22 (51.2%)                                   | 21 (48.8%) |
| Agree strongly                                                                                                                     | 5 (16.7%)                                                       | 25 (83.3%) | 12 (40.0%)                                                                   | 18 (60.0%) | 12 (40.0%)                                   | 18 (60.0%) |
| Missing                                                                                                                            | 0                                                               | 8          | 3                                                                            | 5          | 3                                            | 5          |
| <b>Somewhat / strongly agree I am treated fairly (vs. neutral / disagree), n (%)</b>                                               | 0.88                                                            |            | 0.20                                                                         |            | 0.026                                        |            |
| Yes                                                                                                                                | 15 (20.5%)                                                      | 58 (79.5%) | 34 (46.6%)                                                                   | 39 (53.4%) | 34 (46.6%)                                   | 39 (53.4%) |
| No                                                                                                                                 | 10 (21.7%)                                                      | 36 (78.3%) | 27 (58.7%)                                                                   | 19 (41.3%) | 31 (67.4%)                                   | 15 (32.6%) |
| Missing                                                                                                                            | 0                                                               | 8          | 3                                                                            | 5          | 3                                            | 5          |

|                                                    | Has physical health interfered with your ability to do daily work |            |         | Work I do is meaningful to me (categorized) |            |             |         |
|----------------------------------------------------|-------------------------------------------------------------------|------------|---------|---------------------------------------------|------------|-------------|---------|
|                                                    | Yes                                                               | No         | P-value | 1-2                                         | 3-5        | 6-7         | P-value |
| <b>Gender, n (%)</b>                               |                                                                   |            | 0.16    |                                             |            |             | 0.78    |
| Male                                               | 13 (14.4%)                                                        | 77 (85.6%) |         | 1 (1.1%)                                    | 19 (21.1%) | 70 (77.8%)  |         |
| Female                                             | 9 (25.0%)                                                         | 27 (75.0%) |         | 1 (2.8%)                                    | 7 (19.4%)  | 28 (77.8%)  |         |
| Missing                                            | 0                                                                 | 1          |         | 0                                           | 0          | 1           |         |
| <b>When did you graduate medical school, n (%)</b> |                                                                   |            | 0.50    |                                             |            |             | 0.27    |
| <2 years                                           |                                                                   |            |         |                                             |            |             |         |
| 2-5 years                                          | 1 (33.3%)                                                         | 2 (66.7%)  |         | 0 (0.0%)                                    | 2 (66.7%)  | 1 (33.3%)   |         |
| 6-10 years                                         | 3 (21.4%)                                                         | 11 (78.6%) |         | 1 (7.1%)                                    | 3 (21.4%)  | 10 (71.4%)  |         |
| 11-15 years                                        | 5 (26.3%)                                                         | 14 (73.7%) |         | 0 (0.0%)                                    | 3 (15.8%)  | 16 (84.2%)  |         |
| 16+ years                                          | 13 (14.3%)                                                        | 78 (85.7%) |         | 1 (1.1%)                                    | 18 (19.8%) | 72 (79.1%)  |         |
| <b>When did you begin working at UHN, n (%)</b>    |                                                                   |            | 0.93    |                                             |            |             | 0.88    |
| <2 years                                           | 3 (16.7%)                                                         | 15 (83.3%) |         | 0 (0.0%)                                    | 5 (27.8%)  | 13 (72.2%)  |         |
| 2-5 years                                          | 5 (23.8%)                                                         | 16 (76.2%) |         | 1 (4.8%)                                    | 5 (23.8%)  | 15 (71.4%)  |         |
| 6-10 years                                         | 4 (17.4%)                                                         | 19 (82.6%) |         | 0 (0.0%)                                    | 4 (17.4%)  | 19 (82.6%)  |         |
| 11-15 years                                        | 4 (16.7%)                                                         | 20 (83.3%) |         | 0 (0.0%)                                    | 5 (20.8%)  | 19 (79.2%)  |         |
| 16+ years                                          | 6 (14.6%)                                                         | 35 (85.4%) |         | 1 (2.4%)                                    | 7 (17.1%)  | 33 (80.5%)  |         |
| <b>Specialty, n (%)</b>                            |                                                                   |            | 0.33    |                                             |            |             | 0.022   |
| Anaesthesia                                        | 7 (20.0%)                                                         | 28 (80.0%) |         | 2 (5.7%)                                    | 12 (34.3%) | 21 (60.0%)  |         |
| Cardiac Rehabilitation                             | 1 (25.0%)                                                         | 3 (75.0%)  |         | 0 (0.0%)                                    | 0 (0.0%)   | 4 (100.0%)  |         |
| Cardiac Surgery                                    | 4 (40.0%)                                                         | 6 (60.0%)  |         | 0 (0.0%)                                    | 0 (0.0%)   | 10 (100.0%) |         |
| Cardiology                                         | 7 (13.0%)                                                         | 47 (87.0%) |         | 0 (0.0%)                                    | 9 (16.7%)  | 45 (83.3%)  |         |
| Medical Imaging                                    | 3 (21.4%)                                                         | 11 (78.6%) |         | 0 (0.0%)                                    | 1 (7.1%)   | 13 (92.9%)  |         |
| Vascular Surgery                                   | 0 (0.0%)                                                          | 8 (100.0%) |         | 0 (0.0%)                                    | 2 (25.0%)  | 6 (75.0%)   |         |
| Other                                              | 0 (0.0%)                                                          | 2 (100.0%) |         | 0 (0.0%)                                    | 2 (100.0%) | 0 (0.0%)    |         |
| <b>Rate satisfaction with the EMR, n (%)</b>       |                                                                   |            | 0.89    |                                             |            |             | 0.31    |
| Very unsatisfied                                   | 3 (14.3%)                                                         | 18 (85.7%) |         | 1 (4.8%)                                    | 8 (38.1%)  | 12 (57.1%)  |         |
| Somewhat unsatisfied                               | 3 (13.6%)                                                         | 19 (86.4%) |         | 0 (0.0%)                                    | 4 (18.2%)  | 18 (81.8%)  |         |
| Neutral                                            | 4 (18.2%)                                                         | 18 (81.8%) |         | 0 (0.0%)                                    | 2 (9.1%)   | 20 (90.9%)  |         |
| Somewhat satisfied                                 | 10 (22.7%)                                                        | 34 (77.3%) |         | 1 (2.3%)                                    | 11 (25.0%) | 32 (72.7%)  |         |
| Very satisfied                                     | 2 (20.0%)                                                         | 8 (80.0%)  |         | 0 (0.0%)                                    | 1 (10.0%)  | 9 (90.0%)   |         |
| Missing                                            | 0                                                                 | 8          |         | 0                                           | 0          | 8           |         |

**Has physical health interfered with your ability to do daily work**

**Work I do is meaningful to me (categorized)**

|                                                                                                                                   |            |            |           |            |             |
|-----------------------------------------------------------------------------------------------------------------------------------|------------|------------|-----------|------------|-------------|
| <b>Somewhat / very satisfied with EMR (vs. neutral / unsatisfied), n (%)</b>                                                      | 0.34       |            | 0.99      |            |             |
| Yes                                                                                                                               | 12 (22.2%) | 42 (77.8%) | 1 (1.9%)  | 12 (22.2%) | 41 (75.9%)  |
| No                                                                                                                                | 10 (15.4%) | 55 (84.6%) | 1 (1.5%)  | 14 (21.5%) | 50 (76.9%)  |
| Missing                                                                                                                           | 0          | 8          | 0         | 0          | 8           |
| <b>Staffing levels in this work setting are sufficient, n (%)</b>                                                                 | 0.21       |            | 0.34      |            |             |
| Disagree strongly                                                                                                                 | 9 (25.0%)  | 27 (75.0%) | 1 (2.8%)  | 12 (33.3%) | 23 (63.9%)  |
| Disagree somewhat                                                                                                                 | 10 (23.8%) | 32 (76.2%) | 1 (2.4%)  | 8 (19.0%)  | 33 (78.6%)  |
| Neutral                                                                                                                           | 0 (0.0%)   | 7 (100.0%) | 0 (0.0%)  | 1 (14.3%)  | 6 (85.7%)   |
| Agree somewhat                                                                                                                    | 1 (5.3%)   | 18 (94.7%) | 0 (0.0%)  | 5 (26.3%)  | 14 (73.7%)  |
| Agree strongly                                                                                                                    | 2 (13.3%)  | 13 (86.7%) | 0 (0.0%)  | 0 (0.0%)   | 15 (100.0%) |
| Missing                                                                                                                           | 0          | 8          | 0         | 0          | 8           |
| <b>Somewhat / strongly agree staffing levels in work setting are adequate (vs. neutral / somewhat or strongly disagree), n(%)</b> | 0.086      |            | 0.30      |            |             |
| Yes                                                                                                                               | 3 (8.8%)   | 31 (91.2%) | 0 (0.0%)  | 5 (14.7%)  | 29 (85.3%)  |
| No                                                                                                                                | 19 (22.4%) | 66 (77.6%) | 2 (2.4%)  | 21 (24.7%) | 62 (72.9%)  |
| Missing                                                                                                                           | 0          | 8          | 0         | 0          | 8           |
| <b>I am treated fairly in the workplace, n (%)</b>                                                                                | 0.059      |            | 0.0038    |            |             |
| Disagree strongly                                                                                                                 | 5 (50.0%)  | 5 (50.0%)  | 1 (10.0%) | 3 (30.0%)  | 6 (60.0%)   |
| Disagree somewhat                                                                                                                 | 3 (14.3%)  | 18 (85.7%) | 0 (0.0%)  | 10 (47.6%) | 11 (52.4%)  |
| Neutral                                                                                                                           | 4 (26.7%)  | 11 (73.3%) | 1 (6.7%)  | 1 (6.7%)   | 13 (86.7%)  |
| Agree somewhat                                                                                                                    | 7 (16.3%)  | 36 (83.7%) | 0 (0.0%)  | 10 (23.3%) | 33 (76.7%)  |
| Agree strongly                                                                                                                    | 3 (10.0%)  | 27 (90.0%) | 0 (0.0%)  | 2 (6.7%)   | 28 (93.3%)  |
| Missing                                                                                                                           | 0          | 8          | 0         | 0          | 8           |
| <b>Somewhat / strongly agree I am treated fairly (vs. neutral / disagree), n (%)</b>                                              | 0.090      |            | 0.031     |            |             |
| Yes                                                                                                                               | 10 (13.7%) | 63 (86.3%) | 0 (0.0%)  | 12 (16.4%) | 61 (83.6%)  |
| No                                                                                                                                | 12 (26.1%) | 34 (73.9%) | 2 (4.3%)  | 14 (30.4%) | 30 (65.2%)  |
| Missing                                                                                                                           | 0          | 8          | 0         | 0          | 8           |

**Work schedule leaves enough time for personal life  
(categorized)**

|                                                                              | 1-2        | 3          | 4-5        | P-value |
|------------------------------------------------------------------------------|------------|------------|------------|---------|
| <b>Gender, n (%)</b>                                                         |            |            |            | 0.63    |
| Male                                                                         | 53 (58.9%) | 20 (22.2%) | 17 (18.9%) |         |
| Female                                                                       | 18 (50.0%) | 9 (25.0%)  | 9 (25.0%)  |         |
| Missing                                                                      | 1          | 0          | 0          |         |
| <b>When did you graduate medical school, n (%)</b>                           |            |            |            | 0.66    |
| <2 years                                                                     |            |            |            |         |
| 2-5 years                                                                    | 2 (66.7%)  | 0 (0.0%)   | 1 (33.3%)  |         |
| 6-10 years                                                                   | 7 (50.0%)  | 5 (35.7%)  | 2 (14.3%)  |         |
| 11-15 years                                                                  | 13 (68.4%) | 4 (21.1%)  | 2 (10.5%)  |         |
| 16+ years                                                                    | 50 (54.9%) | 20 (22.0%) | 21 (23.1%) |         |
| <b>When did you begin working at UHN, n (%)</b>                              |            |            |            | 0.079   |
| <2 years                                                                     | 7 (38.9%)  | 7 (38.9%)  | 4 (22.2%)  |         |
| 2-5 years                                                                    | 15 (71.4%) | 5 (23.8%)  | 1 (4.8%)   |         |
| 6-10 years                                                                   | 16 (69.6%) | 3 (13.0%)  | 4 (17.4%)  |         |
| 11-15 years                                                                  | 14 (58.3%) | 7 (29.2%)  | 3 (12.5%)  |         |
| 16+ years                                                                    | 20 (48.8%) | 7 (17.1%)  | 14 (34.1%) |         |
| <b>Specialty, n (%)</b>                                                      |            |            |            | 0.064   |
| Anaesthesia                                                                  | 25 (71.4%) | 8 (22.9%)  | 2 (5.7%)   |         |
| Cardiac Rehabilitation                                                       | 0 (0.0%)   | 2 (50.0%)  | 2 (50.0%)  |         |
| Cardiac Surgery                                                              | 6 (60.0%)  | 1 (10.0%)  | 3 (30.0%)  |         |
| Cardiology                                                                   | 30 (55.6%) | 12 (22.2%) | 12 (22.2%) |         |
| Medical Imaging                                                              | 4 (28.6%)  | 6 (42.9%)  | 4 (28.6%)  |         |
| Vascular Surgery                                                             | 6 (75.0%)  | 0 (0.0%)   | 2 (25.0%)  |         |
| Other                                                                        | 1 (50.0%)  | 0 (0.0%)   | 1 (50.0%)  |         |
| <b>Rate satisfaction with EMR, n (%)</b>                                     |            |            |            | 0.060   |
| Very unsatisfied                                                             | 17 (81.0%) | 2 (9.5%)   | 2 (9.5%)   |         |
| Somewhat unsatisfied                                                         | 13 (59.1%) | 4 (18.2%)  | 5 (22.7%)  |         |
| Neutral                                                                      | 11 (50.0%) | 8 (36.4%)  | 3 (13.6%)  |         |
| Somewhat satisfied                                                           | 26 (59.1%) | 12 (27.3%) | 6 (13.6%)  |         |
| Very satisfied                                                               | 4 (40.0%)  | 1 (10.0%)  | 5 (50.0%)  |         |
| Missing                                                                      | 1          | 2          | 5          |         |
| <b>Somewhat / very satisfied with EMR (vs. neutral / unsatisfied), n (%)</b> |            |            |            | 0.68    |
| Yes                                                                          | 30 (55.6%) | 13 (24.1%) | 11 (20.4%) |         |
| No                                                                           | 41 (63.1%) | 14 (21.5%) | 10 (15.4%) |         |
| Missing                                                                      | 1          | 2          | 5          |         |



**Work schedule leaves enough time for personal life  
(categorized)**

|                                                                                                                                    |            |            |            |        |
|------------------------------------------------------------------------------------------------------------------------------------|------------|------------|------------|--------|
| <b>Staffing levels in this work setting are sufficient, n (%)</b>                                                                  |            |            |            | 0.046  |
| Disagree strongly                                                                                                                  | 26 (72.2%) | 6 (16.7%)  | 4 (11.1%)  |        |
| Disagree somewhat                                                                                                                  | 28 (66.7%) | 8 (19.0%)  | 6 (14.3%)  |        |
| Neutral                                                                                                                            | 3 (42.9%)  | 3 (42.9%)  | 1 (14.3%)  |        |
| Agree somewhat                                                                                                                     | 10 (52.6%) | 6 (31.6%)  | 3 (15.8%)  |        |
| Agree strongly                                                                                                                     | 4 (26.7%)  | 4 (26.7%)  | 7 (46.7%)  |        |
| Missing                                                                                                                            | 1          | 2          | 5          |        |
| <b>Somewhat / strongly agree staffing levels in work setting are adequate (vs. neutral / somewhat or strongly disagree), n (%)</b> |            |            |            | 0.025  |
| Yes                                                                                                                                | 14 (41.2%) | 10 (29.4%) | 10 (29.4%) |        |
| No                                                                                                                                 | 57 (67.1%) | 17 (20.0%) | 11 (12.9%) |        |
| Missing                                                                                                                            | 1          | 2          | 5          |        |
| <b>I am treated fairly in the workplace, n (%)</b>                                                                                 |            |            |            | 0.0038 |
| Disagree strongly                                                                                                                  | 9 (90.0%)  | 0 (0.0%)   | 1 (10.0%)  |        |
| Disagree somewhat                                                                                                                  | 15 (71.4%) | 3 (14.3%)  | 3 (14.3%)  |        |
| Neutral                                                                                                                            | 9 (60.0%)  | 5 (33.3%)  | 1 (6.7%)   |        |
| Agree somewhat                                                                                                                     | 30 (69.8%) | 7 (16.3%)  | 6 (14.0%)  |        |
| Agree strongly                                                                                                                     | 8 (26.7%)  | 12 (40.0%) | 10 (33.3%) |        |
| Missing                                                                                                                            | 1          | 2          | 5          |        |
| <b>Somewhat / strongly agree I am treated fairly (vs. neutral / disagree), n (%)</b>                                               |            |            |            | 0.09   |
| Yes                                                                                                                                | 38 (52.1%) | 19 (26.0%) | 16 (21.9%) |        |
| No                                                                                                                                 | 33 (71.7%) | 8 (17.4%)  | 5 (10.9%)  |        |
| Missing                                                                                                                            | 1          | 2          | 5          |        |
